# Supplementary material for: Testing predictions of inclusive fitness theory in inbreeding relatives with biparental care
Source: PubMed Central journal article supplement (PMC6939262; doi:10.1098/rspb.2019.1933), 2019-12-04
Supplement: rspb20191933supp1.pdf [file rspb20191933supp1.pdf]

## **Electronic Supplementary Materials**

### **Testing predictions of inclusive fitness theory in inbreeding relatives with biparental care**

Elizabeth A Gow, Peter Arcese, Danielle Dagenais, Rebecca J Sardell, Scott Wilson, Jane M

Reid

Proceedings of the Royal Society B

DOI: 10.1098/rspb.2019.1933

#### **Table of contents:**

**Appendix S1:** Calculation of metrics of parent-offspring relatedness

**Figure S1:** Schematic illustration of calculation of relatedness

**Figure S2:** Example calculation of total allelic value (TAV)

**Figure S3:** Example calculation of lost allelic value (LAV)

**Appendix S2:** Further details of paternity and pedigree analyses, and observation of feeding rates

**Appendix S3:** Null model variables, and focal and null variable distributions

**Figure S4:** Frequency histograms of null and focal variables

**Figure S5:** Relationships between parental feeding rates and time of season and nestling age

**Figure S6:** Relationships between parental feeding rates and brood size

**Figure S7:** Relationships between parental feeding rates and social status

**Appendix S4:** Relationships between male and female total allelic value (TAV) and brood size

**Figure S8:** Female and male TAV and brood size

**Figure S9:** TAV for males versus females within a pair

**Appendix S5:** Relationships between proportion of extra-pair offspring ( $P_{EPO}$ ) and other variables

**Figure S10.** Relationship between  $P_{EPO}$  and social status

- 27           **Figure S11.** Relationship between lost allelic value (LAV) and  $P_{EPO}$
- 28           **Figure S12:** Relationships between female and male feeding rates and  $P_{EPO}$
- 29   **Appendix S6:** Supplementary results
- 30           **Table S1:** Null model variables and results from the null model
- 31           **Table S2:** Results from models with TAV,  $TAV_z$  and brood size
- 32           **Table S3:** Results from models with focal variables LAV,  $P_{EPO}$ ,  $k_{ij}$ , and  $f_i$  and  $f_j$
- 33
- 34

35

**Appendix S1: Calculation of metrics of parent-offspring relatedness**

36

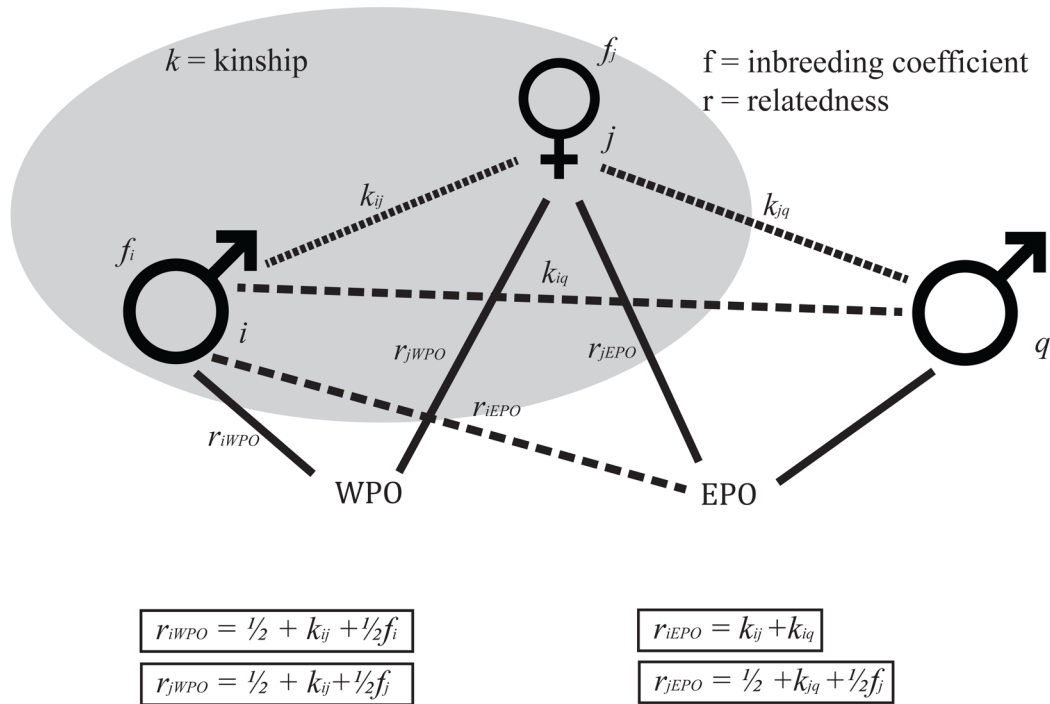

37

38 Figure S1. Schematic illustration of calculation of relatedness between a parent and its genetic offspring (i.e., a male's within-pair  
 39 offspring (WPO) giving  $r_{iWPO}$ , or a female's WPO or extra-pair offspring (EPO) giving  $r_{jWPO}$  and  $r_{jEPO}$ , respectively), and the relatedness  
 40 between a male and an EPO that it did not sire but could rear ( $r_{iEPO}$ ). The parameters  $i$ ,  $j$ , and  $q$  denote the identities of the focal male,  
 41 its socially-paired female, and the female's extra-pair mate (i.e., the sire of the EPO).  $k_{ij}$  is the coefficient of kinship between male  $i$   
 42 and his socially-paired female  $j$ , and is identical to the coefficient of kinship between female  $j$  and male  $i$ .  $k_{iq}$  is the coefficient of

43 kinship between  $i$  and  $j$ 's extra-pair mate  $q$ , and  $k_{jq}$  is the coefficient of kinship between  $j$  and  $q$ .  $f_i$  and  $f_j$  are  $i$  and  $j$ 's own coefficients of  
44 inbreeding respectively. The grey oval highlights the social pairing, involving  $i$  and  $j$ . Dotted lines indicate mating, solid lines indicate  
45 parentage, and dashed lines indicate links between other potentially related individuals.

46

$$\begin{array}{c}
 \text{WPO} \quad + \quad \text{EPO} \quad + \quad \text{WPO} \\
 \begin{array}{l}
 \text{♂} \quad \text{TAV}_i = (r_{i\text{WPO}} = 1/2 + k_{ij} + 1/2 f_i) \quad \left| \quad (r_{i\text{EPO}} = k_{ij} + k_{iq}) \quad \left| \quad (r_{i\text{WPO}} = 1/2 + k_{ij} + 1/2 f_i) \right. \\
 \text{♀} \quad \text{TAV}_j = (r_{j\text{WPO}} = 1/2 + k_{ij} + 1/2 f_j) \quad \left| \quad (r_{j\text{EPO}} = 1/2 + k_{jq} + 1/2 f_j) \quad \left| \quad (r_{j\text{WPO}} = 1/2 + k_{ij} + 1/2 f_j) \right.
 \end{array}
 \end{array}$$

47

48

49 Figure S2. Example calculation of total allelic value (TAV) for a socially-paired male and female  
 50 rearing a hypothetical brood comprising two within-pair offspring (WPO) and one extra-pair  
 51 offspring (EPO), and hence total brood size (BS) of three nestlings. TAV is calculated by  
 52 summing appropriate values of relatedness for each nestling in the brood, calculated with  
 53 respect to each focal parent using the formulae specified (see also Figure S1). Note that this can  
 54 generate different values of TAV with respect to a focal male  $i$  ( $\text{TAV}_i$ ) and his socially-paired  
 55 female  $j$  ( $\text{TAV}_j$ ). In general, TAV increases with BS and, conditional on BS, is larger when the  
 56 parents have higher coefficients of inbreeding ( $f_j$  or  $f_i$ ) and/or higher coefficients of kinship ( $k_{ij}$   
 57 and/or  $k_{iq}$  and/or  $k_{jq}$ ). All terminology is defined in figure S1.

58

59

60

61

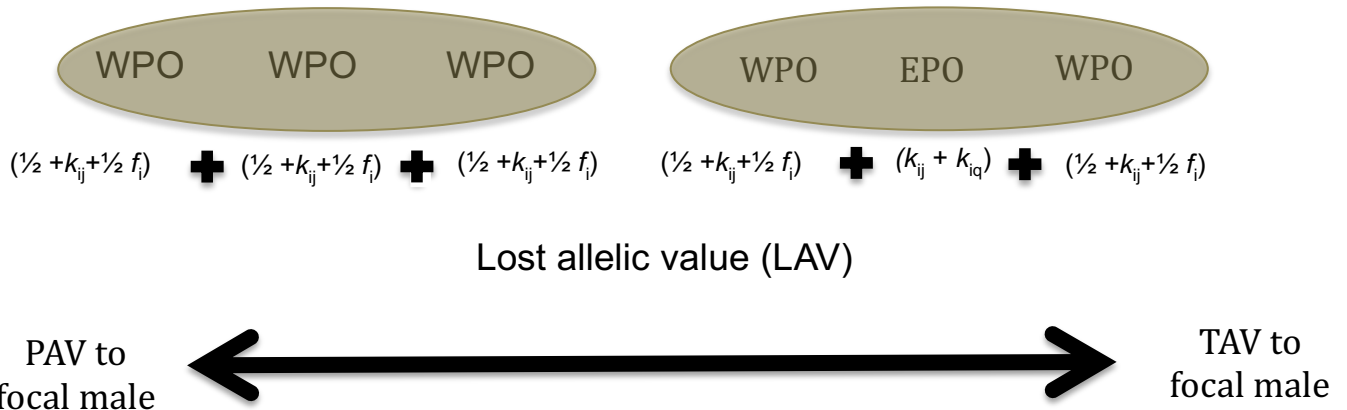

62

63 Figure S3. Example calculation of lost allelic value (LAV) as the decrease in total allelic value of  
 64 a brood to a focal male ( $TAV_i$ ) resulting from extra-pair paternity (EPP) in offspring produced by  
 65 the male's socially-paired female. LAV is calculated as  $PAV - TAV_i$ , where PAV is the brood's  
 66 potential allelic value to the focal male, which equals the brood's TAV to the male calculated as  
 67 if he had sired the entire brood. WPO and EPO denote within-pair and extra-pair offspring  
 68 respectively. The indices  $i$ ,  $j$ , and  $q$  denote the identities of the focal male, its socially-paired  
 69 female, and the female's extra-pair mate (i.e., the sire of the EPO).  $k_{ij}$  is the coefficient of kinship  
 70 between male  $i$  and its socially-paired female  $j$ , and  $k_{iq}$  is the coefficient of kinship between  $i$  and  
 71  $j$ 's extra-pair mate  $q$ . LAV can therefore take values between 0 (given zero paternity loss) and  
 72  $\frac{1}{2}BS(1+f_i)$  (given complete paternity loss and  $k_{iq}=0$ ).

73

74 **Appendix S2: Further details of paternity and pedigree analyses, and observation of**  
75 **feeding rates**

76 ***Pedigree construction and analysis***

77 All nestlings and adults ringed since 1993 were genotyped at 160 microsatellite loci [1]. The  
78 identities of the genetic parents of each nestling were identified with >99% individual-level  
79 statistical confidence [2,3]. Overall, 28% of nestlings were assigned as EPO and 72% as WPO  
80 [4]. The social pedigree (i.e., constructed from observed social parentage) was corrected for  
81 EPP from 1993 onwards [1,3,5]. Coefficients of kinship ( $k$ ) between any two individuals, and  
82 each individual's own coefficient of inbreeding ( $f$ ) were calculated from the corrected pedigree  
83 using standard algorithms and are relative to a 1975 baseline [2,5,6]. Since the focal individuals  
84 have multiple generations of genetically verified ancestors there is very little error in  $k$  and  $f$   
85 relative to the defined baseline [5]. For reference, values of  $k$  of 0, 0.0625, 0.125, 0.25 indicate  
86 pairings between unrelated individuals and outbred third-order, second-order, and first-order  
87 relatives, respectively. The same values of  $f$  refer to offspring of such pairings. Both  $f$  and  $k$  are  
88 expectations, and realized parent-offspring relatedness will deviate from these expectations due  
89 to Mendelian sampling variance. However, such variance is reduced by inbreeding, and also  
90 reduced across groups of individuals. This implies that deviations between expected and  
91 realized relatedness will commonly be relatively small in our system, especially for TAV for  
92 broods that contain multiple offspring.

93  
94 ***Parental feeding rates***

95 On Mandarte Island, song sparrows construct open cup nests in grass/scrub margins. Individual  
96 parents are typically consistent in the route they approach their nest, as determined by the  
97 orientation of open vegetation and foraging locations. For each focal nest, typical parental  
98 approach routes were determined during extensive observations during incubation (for females)

99 and early stages of chick feeding (both parents). These observations also served to accustom  
100 breeding sparrows to observer presence.

101 For each feeding rate observation session a single observer approached the territory  
102 along established trails, and positioned themselves 15–20m from the focal nest in the best  
103 possible position (often on a free-standing ladder or high rock) to retain a clear line of sight of  
104 incoming parents while minimizing disturbance. A 10–15 min habituation period was then  
105 imposed, during which observers checked for signs of disturbance (e.g. parental alarm calls),  
106 and allowed parental behaviour to return to normal after any initial disturbance. If any signs of  
107 disturbance were evident, the observer changed position and the habituation period was  
108 repeated; however, in most cases no such impacts occurred. The 1-hour session then  
109 commenced, and the observer noted the time of arrival of each parent (as identified from their  
110 colour-rings). It is unlikely that any visits were missed, due to the close proximity to the nest and  
111 consistency in the routes parents took to the nest. However, in three sessions the visiting  
112 parent's identity was uncertain during at least one nest visit. These sessions were excluded from  
113 analyses. The total of 338 retained sessions spanned the 12-day nestling period (2–5 days,  
114 N=112; 6–7 days; N=117; 8–11 days; N=109).

115 Some nests initiated in the population during the focal periods were excluded from field  
116 observations, either because their locations prevented reliable observations without causing  
117 disturbance, or because they failed during incubation or early in the chick-rearing period.  
118 Observers also attempted to visually score food loads as small, medium or large, but such  
119 scoring was not always possible and could not be easily validated. The number of feeding visits  
120 per hour was consequently used as the focal metric, and is taken to capture one aspect of  
121 parental care. There were no observations of parents visiting nests without food, providing no  
122 obvious evidence of 'cheating'. Observations also suggested that parents typically brought  
123 relatively equal amounts of food each visit (e.g. either one or two large items or several small  
124 items), suggesting that feeding rate likely predicts the amount of food provided to offspring.



125 Feeding rate data were collected blind to key predictor variables; indeed, the molecular genetic  
126 paternity analyses required to calculate TAV,  $P_{EPO}$  and LAV were not undertaken until after each  
127 breeding season had finished. Extra-pair sires were never observed to visit nests where they  
128 had sired extra-pair offspring.

129

130

131 **Appendix S3: Null model variables, and focal and null and variable distributions**

132 Over half of the observation sessions were at monogamous nests (N=192), while the rest were  
133 split between primary polygynous and secondary polygynous nests (N= 74 and 71, respectively;  
134 Fig S4a). Across all 138 observed nests, mean brood size was  $2.9 \pm 1.0$  nestlings (median: 3,  
135 range 1-4, Fig. S4b). Mean TAV values were  $1.411 \pm 0.682$  (range 0.063–2.946) for males and  
136  $1.785 \pm 0.584$  (range 0.538–2.998) for females (Fig S4c, d). Mean  $P_{EPO}$  was  $0.27 \pm 0.35$  (median 0,  
137 range 0–1, 52% zeros; Fig S4e). Mean LAV was  $0.208 \pm 0.373$  (median 0.000, range 0.000–  
138 1.913, 50% zeros; Fig S4f). Across all 75 observed female-male pairs, mean  $k_{ij}$  was  $0.085 \pm 0.054$   
139 (range 0.000–0.300, Fig S4g). Mean  $f_i$  was  $0.056 \pm 0.038$  (range 0.000–0.181) across 55  
140 individual males (Fig S4h) and mean  $f_j$  was  $0.055 \pm 0.035$  (range 0.000–0.164) across 65  
141 individual females (Fig S4i).

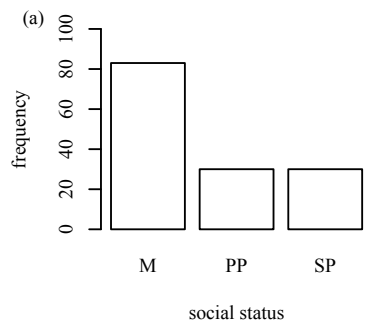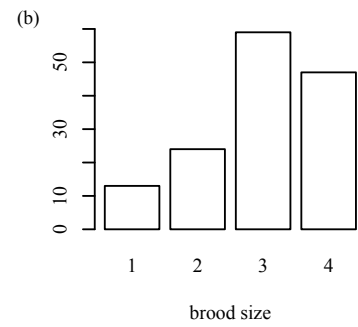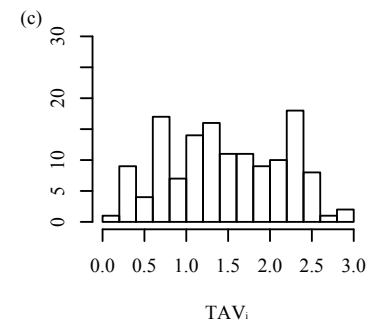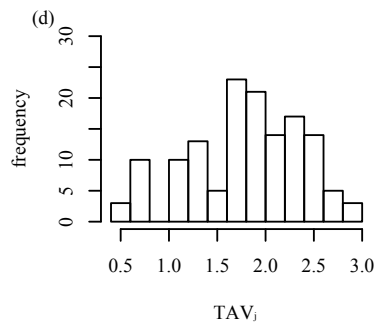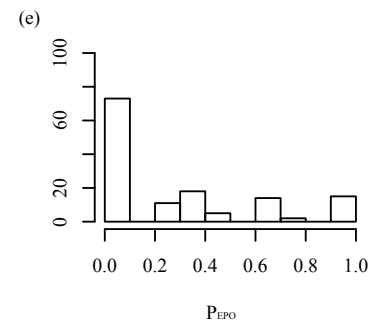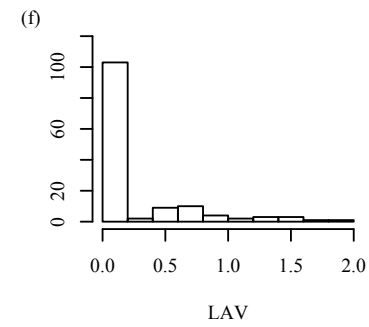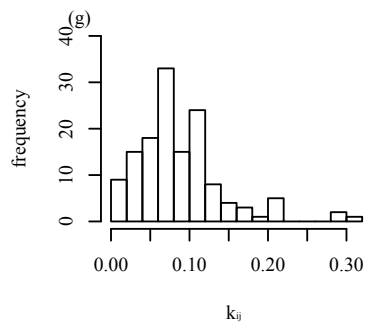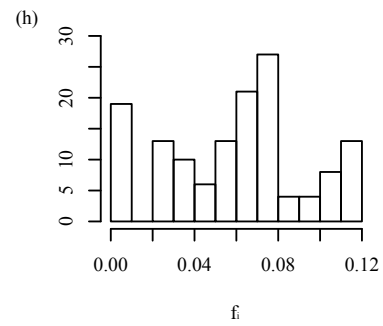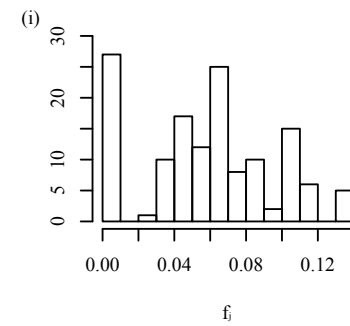

143 Figure S4. Frequency histograms (number of individuals) of null and focal variables. Social statuses (a) are defined as monogamous  
144 (M), only one female per male; primary polygynous (PP), two females per male territory but the first nest to hatch; secondary  
145 polygynous (SP), two or three females per male territory but the second or third nest to hatch.  $TAV_i$  (c) and  $TAV_j$  (d) are the “total  
146 allelic values” for males and females respectively.  $P_{EPO}$  is the proportion of extra-pair offspring in a brood (e) and LAV is the “lost  
147 allelic value” (f).  $k_{ij}$  is the coefficient of kinship between socially-paired mates (g) and male  $f_i$  and female  $f_j$  (h, i) are the coefficients of  
148 inbreeding of the focal male and female.

149

150

151

152

153

154

155

156

157

158

159 **Null model variables**

160 Both sexes' feeding rates increased with increasing nestling age, but male feeding rates decreased as the breeding season  
161 progressed (Fig S5). Models that contained brood size as a linear covariate were slightly better supported than the null model that  
162 excluded brood size for males ( $\Delta AIC_c$ :-0.7) and much more strongly supported for females ( $\Delta AIC_c$ :-11.1). Models that contained  
163 brood size as a continuous variable were better supported than models that contained brood size as a factor for males ( $\Delta AIC_c$ :+3.6)  
164 and females ( $\Delta AIC_c$ :+7.1; Table S2). Male and female feeding rates increased with brood size (Fig S6). Feeding rates varied with  
165 social status, with females feeding more at secondary polygynous than monogamous and primary nests, in contrast males fed less at  
166 secondary polygynous nests (Fig S7).

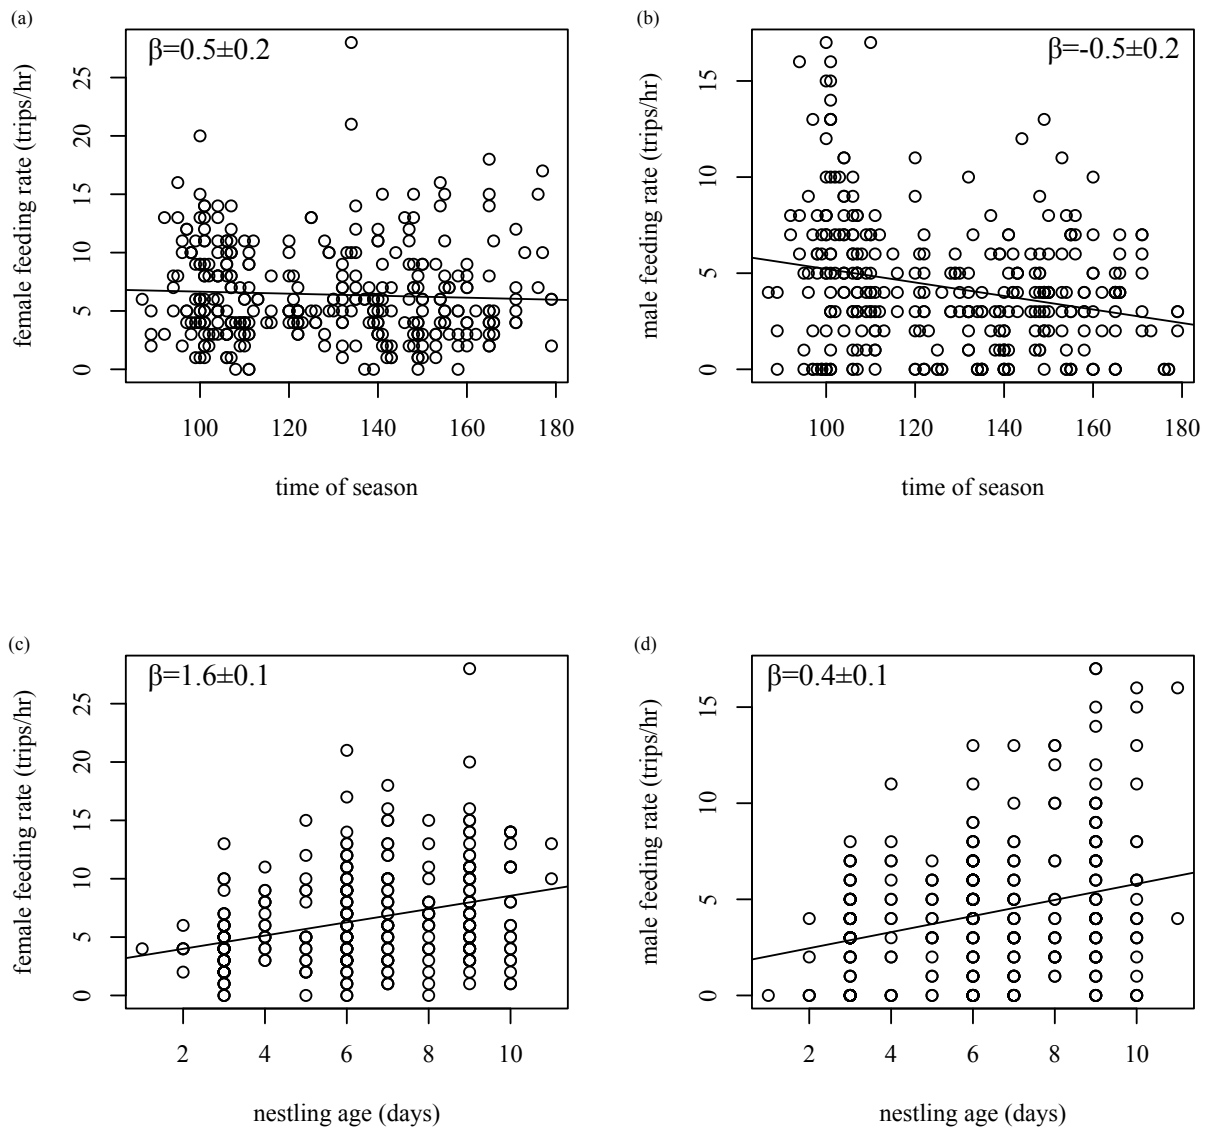

167  
 168 Figure S5. Relationships between male and female feeding rates and time of season (first egg  
 169 date; a, b) and nestling age (c, d). Points denote individual observation sessions and lines  
 170 denote linear regressions. Time of season is in Julian dates, with 1 representing January 1.  $\beta$   
 171 are the estimates from the null model and BS (as a continuous covariate)  $\pm$ SE. Statistics are in  
 172 Appendix S6.

173

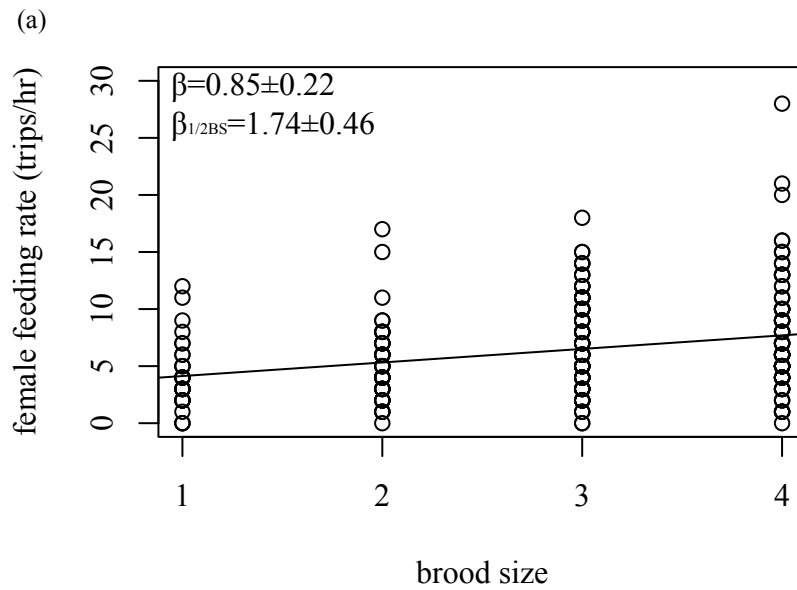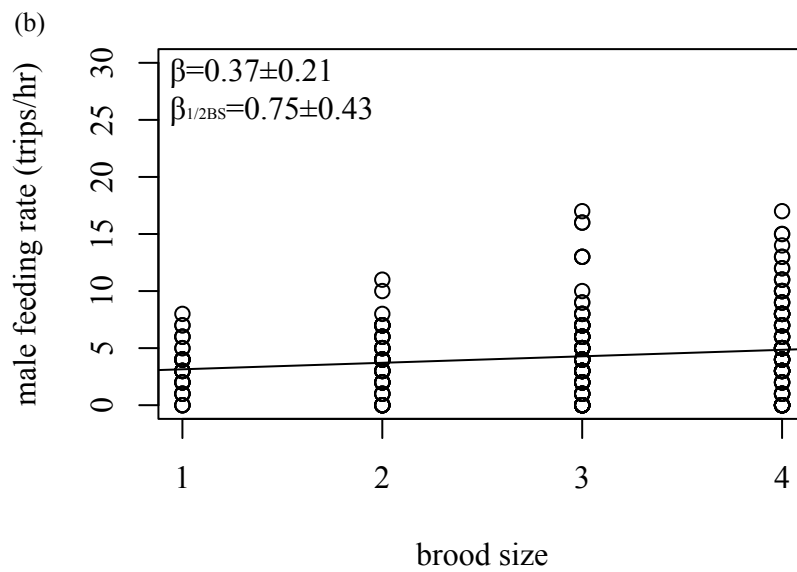

174  
 175 Figure S6. Relationships between female (a) and male (b) feeding rates and brood size. Points  
 176 denote individual observation sessions and lines denote linear regressions.  $\beta$  are the estimates  
 177  $\pm$ SE from the null model and BS (as a continuous variable).  $\beta_{1/2BS}$  indicates the  $\beta$  estimate for a

178 null model and  $\frac{1}{2}$  BS. Slopes of  $\frac{1}{2}$  BS were included as they can be compared to those from

179 TAV.

180

181



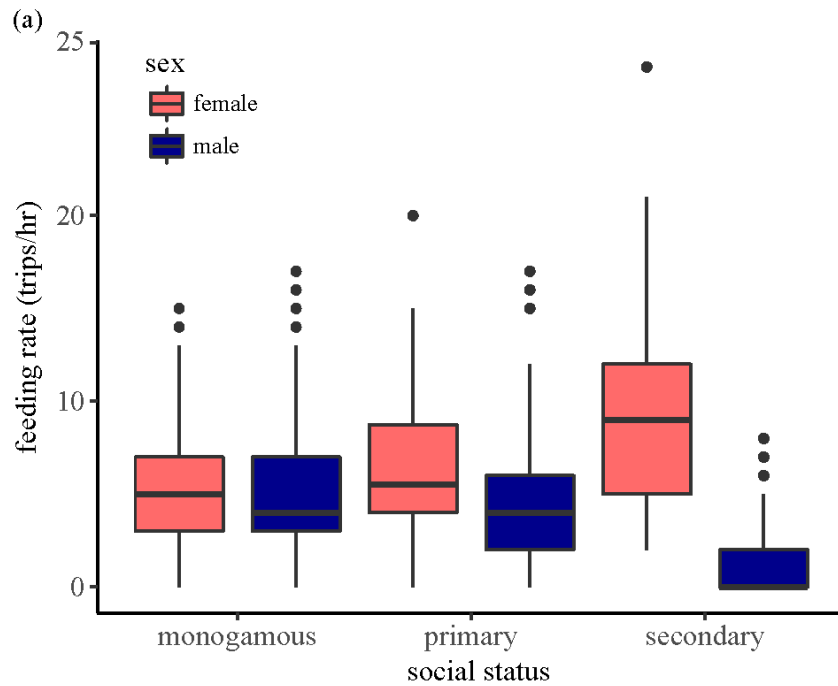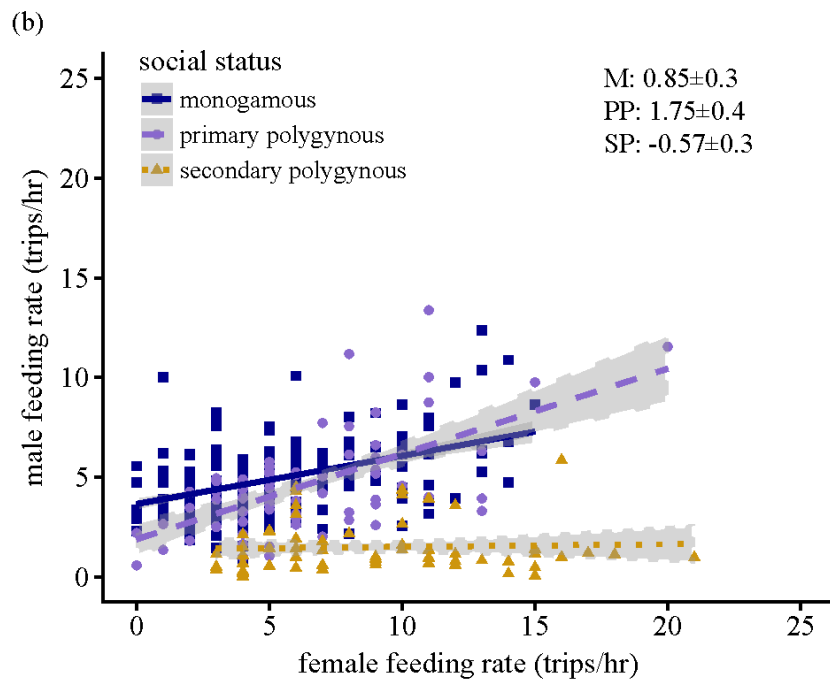

183

184 Figure S7. (a) Female and male feeding rates across 'monogamous', 'primary polygynous' and

185 'secondary polygynous' nests. Boxplots represent the median, upper and lower quartiles, and

186 minimum and maximum values, with outliers depicted by dots. (b) Relationship between male

187 and female feeding rates across nests of different social status. Social statuses are

188 monogamous (M), primary polygynous (PP), and secondary polygynous (SP). Points represent  
189 individual observation sessions, across monogamous (squares, solid line), primary polygynous  
190 (circles, dashed line) and secondary polygynous nests (triangles, dotted line). Lines are linear  
191 predictions for each social status, and grey-shaded areas are confidence intervals around the  
192 line. Numbers on plots represent estimates  $\pm$  standard errors from the null model and BS (as a  
193 continuous variable) for female feeding rates at monogamous, primary and secondary  
194 polygynous nests.  
195

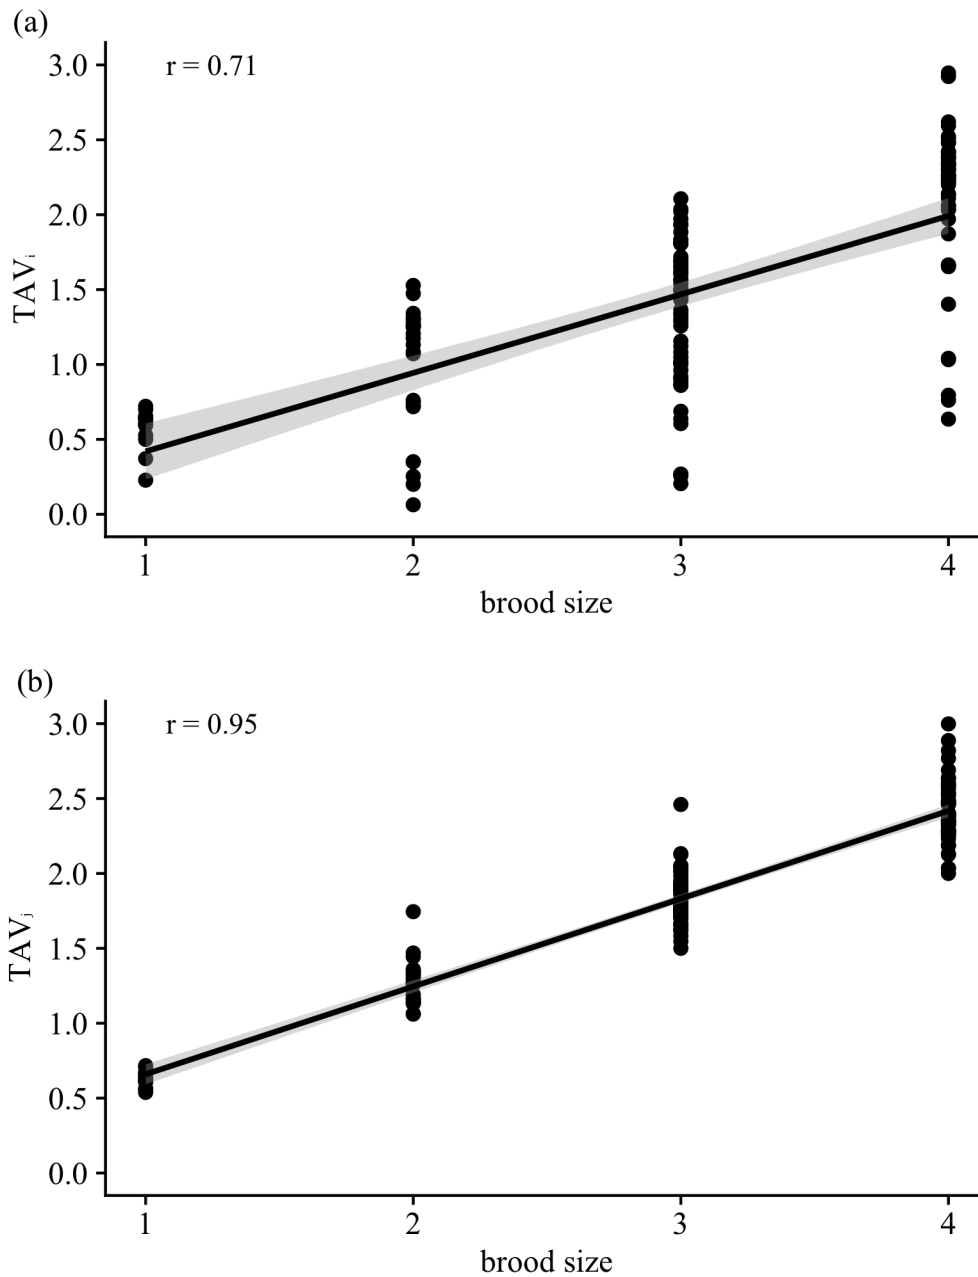

198  
199 Figure S8. Male (a) and female (b) total allelic values (TAV<sub>i</sub> and TAV<sub>j</sub>) of a focal brood in relation  
200 to brood size. Points denote broods (total N=138), and lines denote linear regressions.  $r$   
201 indicates the Pearson correlation coefficient.

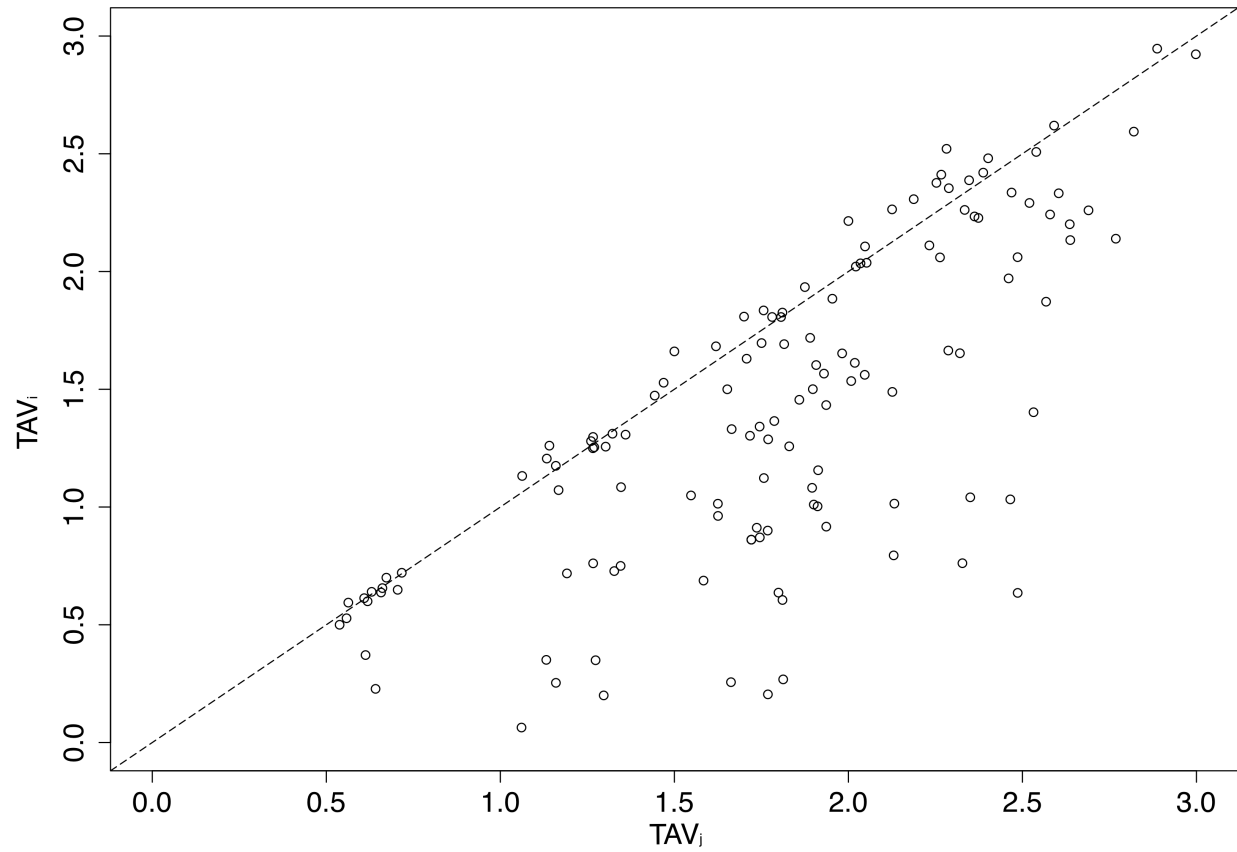

203

204 Figure S9. Total allelic values of a focal brood for males ( $TAV_i$ ) and females ( $TAV_j$ ) within a pair.

205 Points denote broods (total  $N=138$ ) and the dashed line indicates equal TAV values for each pair

206 member. See [8] for more detailed consideration of this relationship.

207

208

### **Appendix S5: Relationships between $P_{EPO}$ and other variables**

209 Traditionally, most studies considering socially monogamous systems with extra-pair paternity  
210 use the proportion of a brood that comprises extra-pair offspring ( $P_{EPO}$ ) as a metric to quantify a  
211 male's relatedness to a brood. Instead, we define "lost allelic value" (LAV) as a more appropriate  
212 metric in systems with reproductive interactions among relatives (Appendix S1). However, to  
213 facilitate comparison with existing studies, we also assessed relationships among  $P_{EPO}$ , feeding  
214 rates, social status, and TAV.

215  $P_{EPO}$  varied with social status (Fig S10).  $P_{EPO}$  was of course strongly positively correlated  
216 with LAV ( $r_p=0.89$ ), but not all values of  $P_{EPO}$  and LAV aligned (Fig S11).  $P_{EPO}$  was not correlated  
217 with  $TAV_j$  (i.e., female TAV,  $r_p=-0.14$ ) but was negatively correlated with  $TAV_i$  (i.e., male TAV,  
218  $r_p=-0.62$ ). Models explaining variation in feeding rates that included  $P_{EPO}$  were similarly  
219 supported as the null model that also included BS (as a continuous variable) for males  
220 ( $\Delta AIC_c=+0.4$ ) but less well supported for females ( $\Delta AIC_c=+1.8$ ); feeding rate decreased with  
221 increasing  $P_{EPO}$  in males but not females (Fig S12). Models that additionally included  $P_{EPO}$  by  
222 social status interactions were similarly well supported as the null model for males ( $\Delta AIC_c=+0.4$ )  
223 and less supported for females ( $\Delta AIC_c=+2.3$ ).

224

225  
226  
227

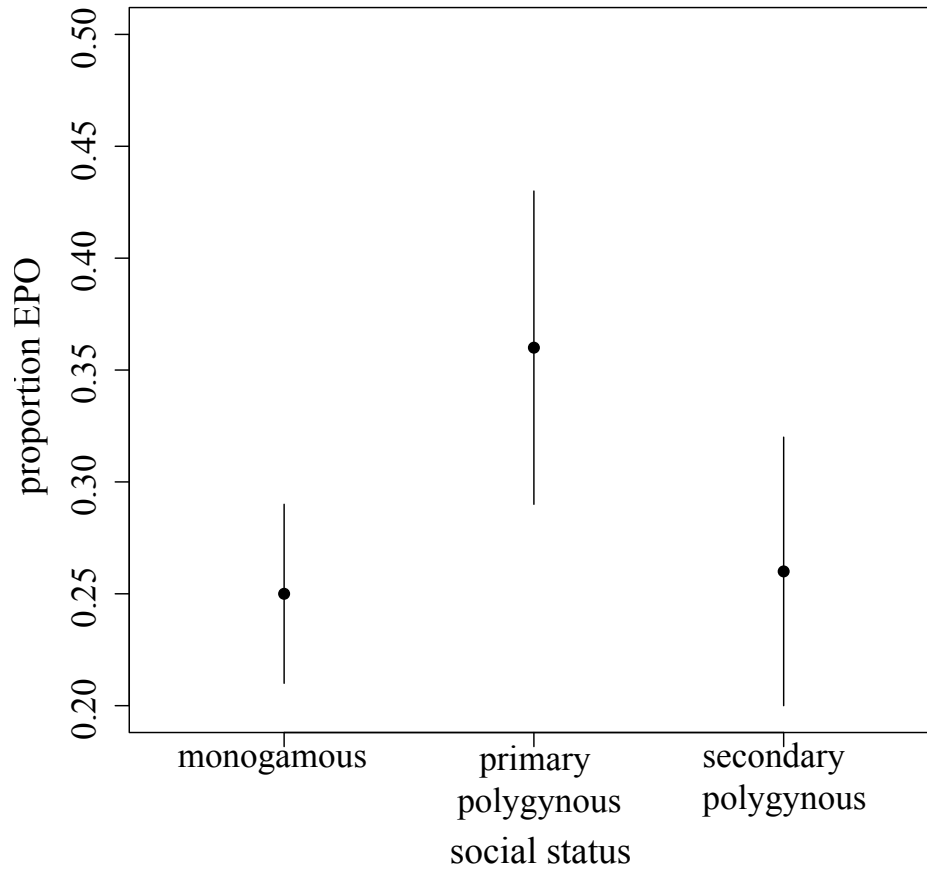

228  
229 Figure S10. The relationship between the proportion of extra-pair offspring ( $P_{EPO}$ ) in a brood and  
230 social status, defined as monogamous (one female per male territory); primary polygynous (two  
231 females per male territory but the first nest to hatch); secondary polygynous (two females per  
232 male territory but the second or third nest to hatch). Points indicate the mean across observed  
233 broods, and bars indicate the 95% CIs.  
234  
235  
236

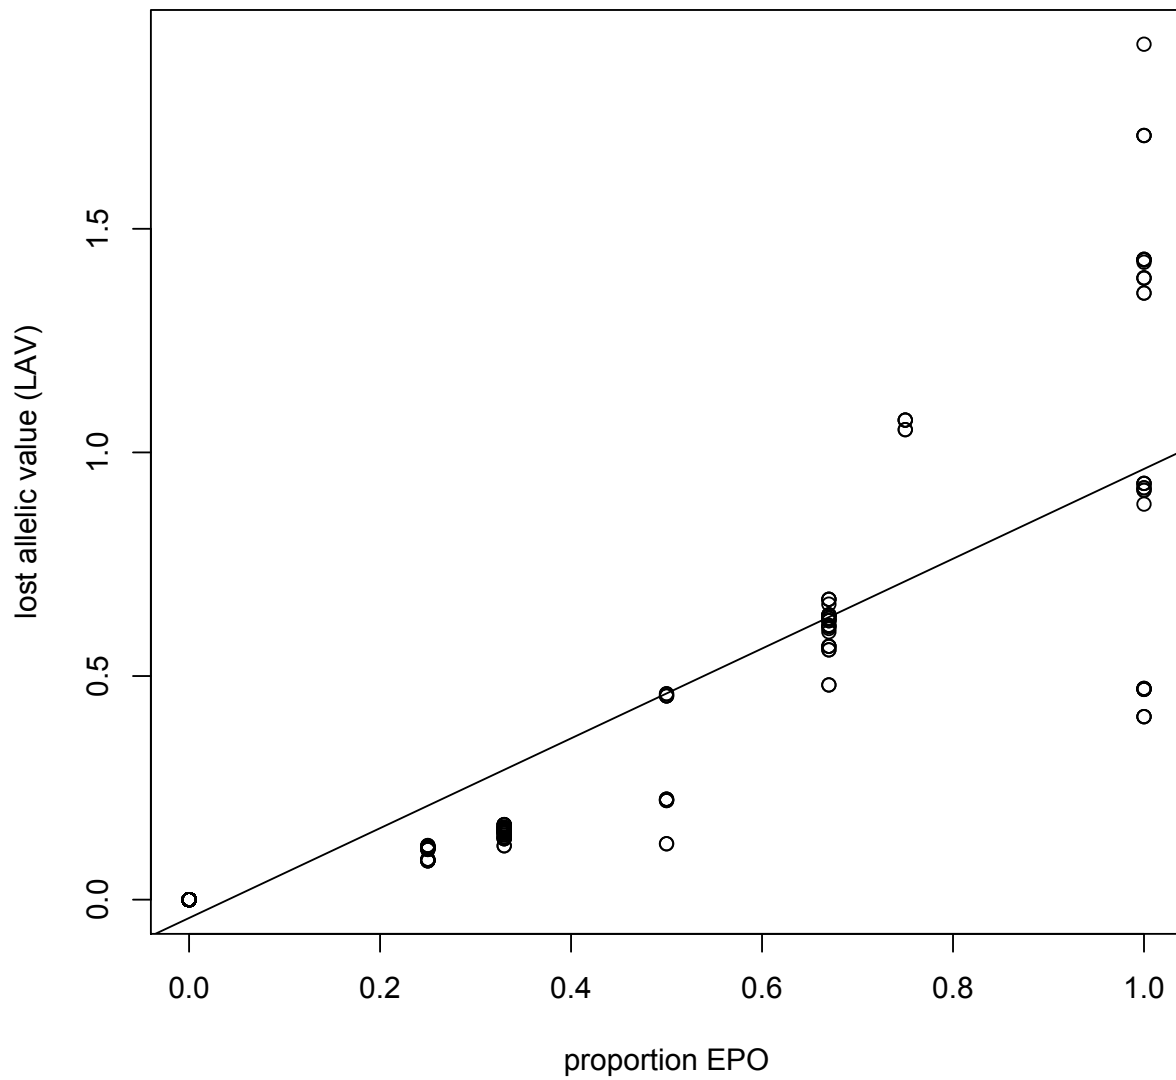

238

239 Figure S11. Relationship between lost allelic value (LAV) and the proportion of extra-pair  
 240 offspring ( $P_{EPO}$ ) in a brood. Points denote broods and the line denotes the linear regression.

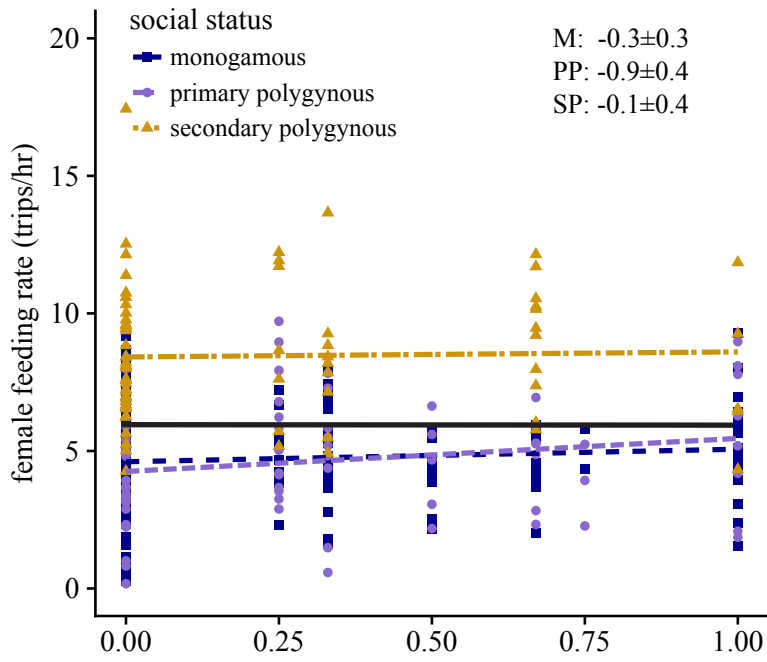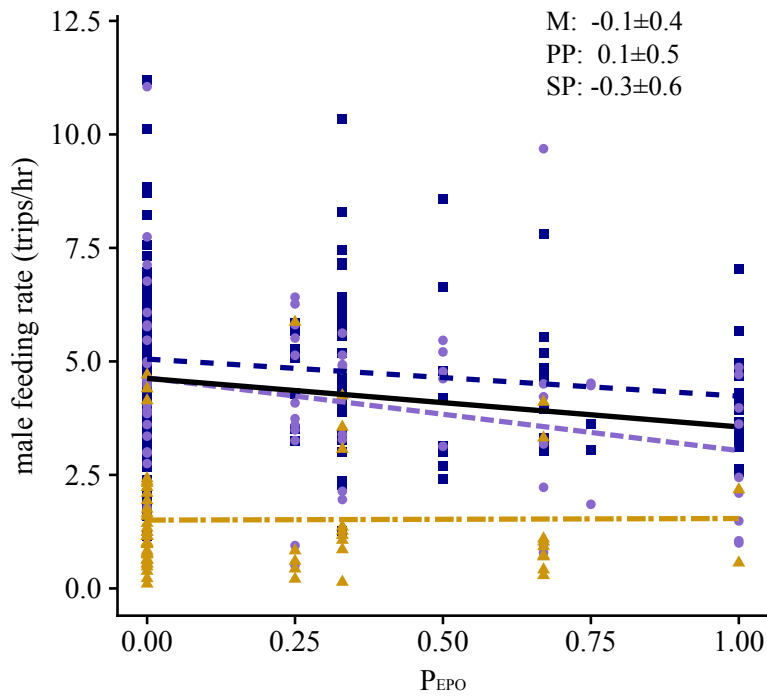

241  
 242 Figure S12. Relationships between (a) female and (b) male song sparrow parental feeding rates  
 243 (trips/hr) and the proportion of EPO in the brood ( $P_{EPO}$ ). Colours indicate nest social status  
 244 (monogamous: blue; primary polygynous: purple; secondary polygynous: yellow). Points



245 represent observation sessions. Lines show predicted regression of feedings rate on  $P_{EPO}$   
246 overall (black), and across each social status. Numbers are the estimates  $\pm$  SE from the  $P_{EPO}$  by  
247 social status interaction model, where “M”, “PP” and “SP” are monogamous, primary and  
248 secondary polygynous nests, respectively. Y-axes are on different scales for males and females.  
249

250 **Appendix S6: Supplementary results**

251 Table S1: Null model variables and results from the null model.

252

253 Table S2: Results from sets of models that contain additive or interactive effects of total allelic  
254 value (TAV), TAV standardized within brood size (TAV<sub>z</sub>) and brood size (BS) on male and  
255 female feeding rates (trips/hr).

256

257 Table S3: Results from each models examining the effects of lost allelic value (LAV), the  
258 proportion of extra-pair offspring in a brood ( $P_{EPO}$ ), kinship ( $k_{ij}$ ), male and female coefficients of  
259 inbreeding ( $f_i$  and  $f_j$ ) in comparison to the null model.

260

261 **References**

- 262 1. Nietlisbach P, Camenisch G, Bucher T, Slate J, Keller LF, Postma E. 2015 A microsatellite-  
263 based linkage map for song sparrows (*Melospiza melodia*). *Molecular Ecology Resources* **15**,  
264 1486–1496. (doi:10.1111/1755-0998.12414)
- 265 2. Reid JM, Keller LF, Marr AB, Nietlisbach P, Sardell RJ, Arcese P. 2014 Pedigree error due to  
266 extra-pair reproduction substantially biases estimates of inbreeding depression. *Evolution* **68**,  
267 802–815.
- 268 3. Reid JM, Arcese P, Bocedi G, Duthie AB, Wolak ME, Keller LF. 2015 Resolving the  
269 conundrum of inbreeding depression but no inbreeding avoidance: Estimating sex-specific  
270 selection on inbreeding by song sparrows (*Melospiza melodia*). *Evolution* **69**, 2846–2861.
- 271 4. Sardell RJ, Keller LF, Arcese P, Bucher T, Reid JM. 2010 Comprehensive paternity  
272 assignment: genotype, spatial location and social status in song sparrows, *Melospiza*  
273 *melodia*. *Molecular Ecology* **19**, 4352–4364. (doi:10.1111/j.1365-294X.2010.04805.x)
- 274 5. Reid JM, Duthie AB, Wolak ME, Arcese P. 2015 Demographic mechanisms of inbreeding  
275 adjustment through extra-pair reproduction. *Journal of Animal Ecology* **84**, 1029–1040.  
276 (doi:10.1111/1365-2656.12340)
- 277 6. Keller LF. 1998 Inbreeding and its fitness effects in an insular population of song sparrows  
278 (*Meospiza melodia*). *Evolution* **52**, 240–250.
- 279 7. R Core Development Team. 2018 *R: A language and environment for statistical computing*. R  
280 *Foundation for Statistical Computing*. Vienna, Austrai. See <http://www.R-project.org>.
- 281 8. Reid JM, Bocedi G, Nietlisbach P, Duthie AB, Wolak ME, Gow EA, Arcese P. 2016 Variation  
282 in parent-offspring kinship in socially monogamous systems with extra-pair reproduction and  
283 inbreeding. *Evolution* **70**, 1512–1529. (doi:10.1111/evo.12953)

284
